# Supplementary material for: Serine and one-carbon metabolism sustain non-melanoma skin cancer progression
Source: PubMed Central journal article supplement (PMC10039038; doi:10.1038/s41420-023-01398-x), 2023-03-24
Supplement: 41420_2023_1398_MOESM1_ESM.pdf [file 41420_2023_1398_MOESM1_ESM.pdf]

## Dataset GSE7553

A

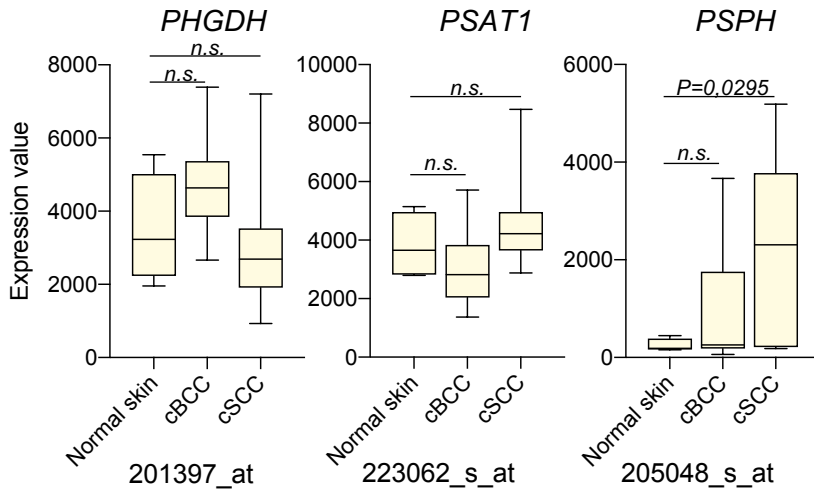

B

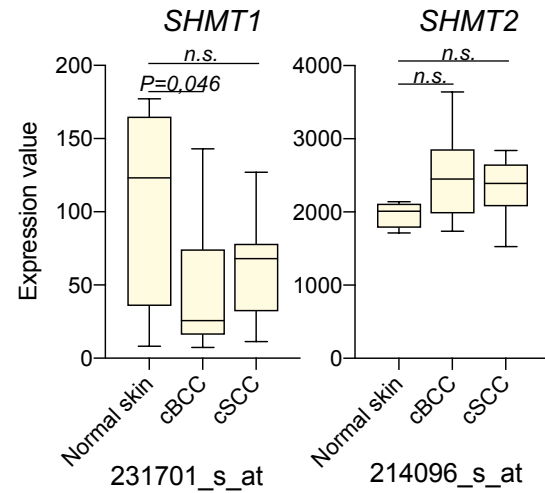

C

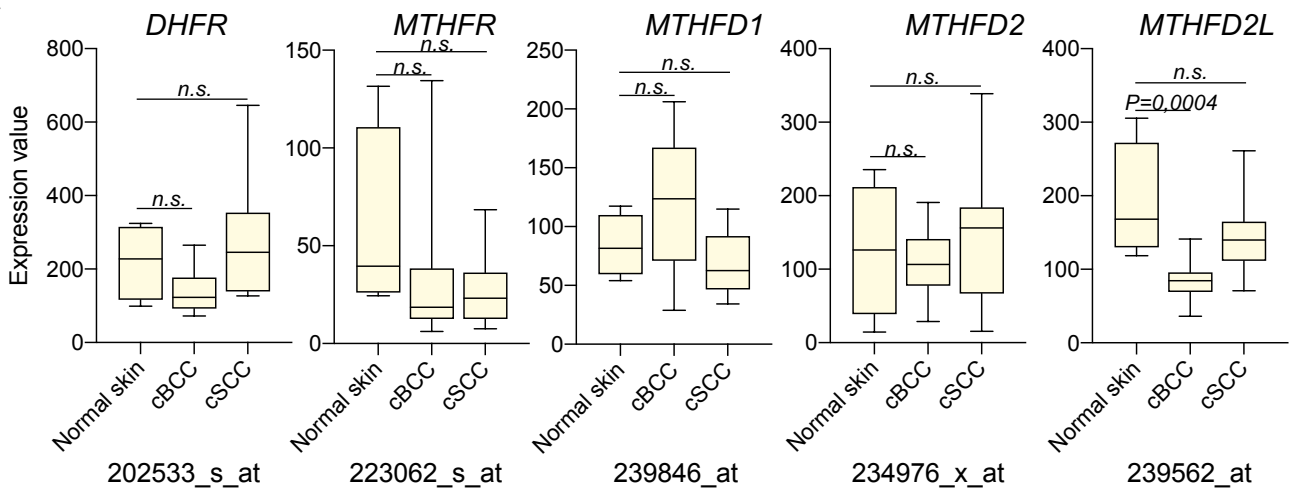

**Supplementary Figure 1. Expression analysis of Serine de novo biosynthesis, Serine anabolism/catabolism and One-Carbon metabolism enzymes in a publicly available dataset of NMSC.** A) Bioinformatic expression analysis performed on a publicly online dataset (GSE7553) of Serine *de novo* biosynthesis enzymes, B) *SHMT1* and *SHMT2*, involved in serine catabolism/anabolism and C) One-carbon metabolism enzymes involved in the Folate Cycle in a cohort of patients with normal skin (n=4), cBCC (n=15), cSCC (n=11). The p-value was obtained using Student's t test. Values were considered significant when the p-value<0.05, n.s.=not significant

Supplementary TABLE 1. qPCR primers

|             |                             |
|-------------|-----------------------------|
| hPHGDH Fw   | CACTGAGGCTGTTCCCATT         |
| hPHGDH Rv   | GTCATCAACGCAGCTGAGAA        |
| hPSAT1 Fw   | TCATCACGGACAATCACCAC        |
| hPSAT1 Rv   | GTCCTCAAACCTTCCTGTCCAA      |
| hPSPH Fw    | CATGATTGGAGATGGTGCCA        |
| hPSPH Rv    | TTATCCTTGACTTGTTGCCTGA      |
| hMTHFR Fw   | GAGCGGCATGAGAGACTCC         |
| hMTHFR Rv   | CCGGTCAAACCTTGAGATGAG       |
| hDHFR Fw    | ATTTCCAGAGAATGACCACAAC      |
| hDHFR Rv    | GAGGTTCCCTTGAGTTCTCTG       |
| hMTHFD1 Fw  | TTGGACAGGCTCCAACGGAGAA      |
| hMTHFD1 Rv  | AGAAGTGGTGAGAGCCAGGACA      |
| hMTHFD2 Fw  | CTACTGTGTCTTCTGTGTAC        |
| hMTHFD2 Rv  | CTGCATGATATCGGAATGCTC       |
| hMTHFD2L Fw | GCAATGGAATTGCCCCAGAAA       |
| hMTHFD2L Rv | GGCAATAGGCATCCCTACGTT       |
| hSHMT1 Fw   | TGACCACCACCACCCACTCACAAGACC |
| hSHMT1 Rv   | GCAATGGCGTGGCAACCCAGCA      |
| hSHMT2 Fw   | AGTGATCCTGAGATGTGGGAGTT     |
| hSHMT2 Rv   | AGGATAACCCTCCGAGTACTTGTT    |
| hTBP Fw     | TCAAACCCAGAATTTGTTCTCCTTAT  |
| hTBP Rv     | CCTGAATCCCTTAGAATAGGGTAG    |

Supplementary TABLE 2. siRNA sequences

|           |                       |
|-----------|-----------------------|
| hSHMT2-1  | CAUUUGAGGACCGAAUCAA   |
| hSHMT2-2  | CCGGGAGAUCCCUUACACAUU |
| hMTHFD2-1 | GGAUGCUUCACUUUGUCAA   |
| hMTHFD2-2 | UGGCAAUGCUAAUGAAGAA   |
