# Supplementary material for: Serine and one-carbon metabolism sustain non-melanoma skin cancer progression
Source: PubMed Central journal article supplement (PMC10039038; doi:10.1038/s41420-023-01398-x), 2023-03-24

Original Data

UVITEC photo documenter

Figure 3 C

Vinculin

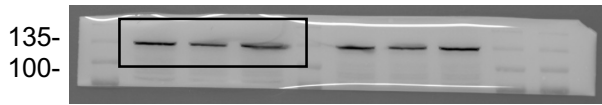

SHMT2

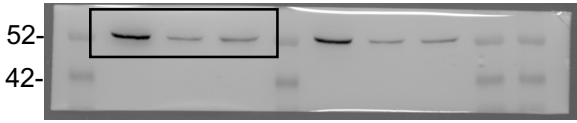

p63

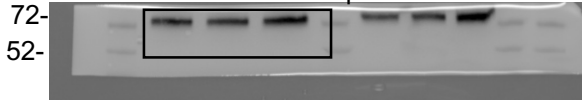

Cyclin-D1

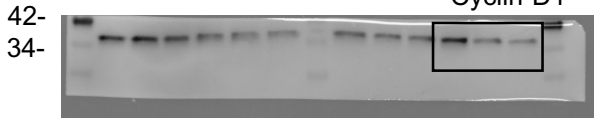

Vinculin

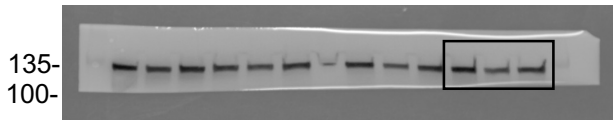

UVITEC photo documenter

Figure 3 G

Vinculin

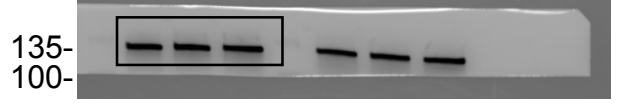

MTHFD2

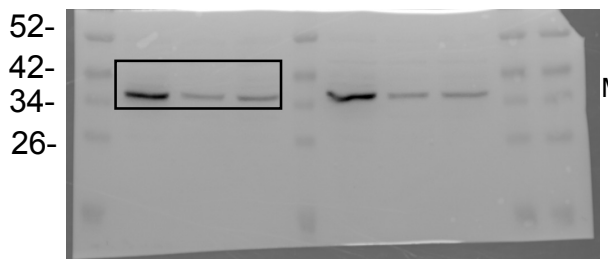

p63

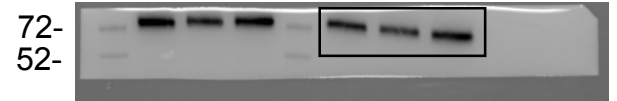

Cyclin-D1

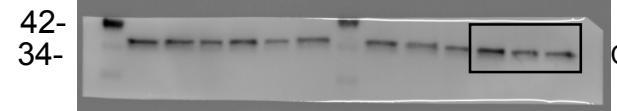

Vinculin

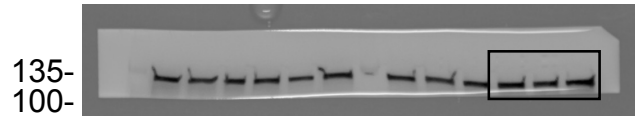

Supplement: 41420_2023_1398_MOESM3_ESM.pdf [file 41420_2023_1398_MOESM3_ESM.pdf]
